# Supplementary material
Source: publisher site journal article supplement (https://www.dovepress.com/article/408858)
Supplement: Supplementary file 1 [file get_supplementary_file.php]

**Supplemental 1. Global perceived effect**

| To what extent have you recovered from your symptoms since starting Infliximab treatment? | 1. Very much improved |
| --- | --- |
| 2. Much improved |
| 3. Slightly improved |
|  | 4. No change |
|  | 5. Slight deterioration |
|  | 6. Much deterioration |
|  | 7. Extreme deterioration |
| How satisfied are you with the treatment? | 1. Extremely satisfied |
| 2. Quite satisfied |
| 3. Slightly satisfied |
| 4. Neither satisfied nor dissatisfied |
| 5. Slightly dissatisfied |
| 6. Quite dissatisfied |
| 7. Extremely dissatisfied |
